# Supplementary material for: A polypeptide micelle template method to prepare polydopamine composite nanoparticles for synergistic photothermal–chemotherapy
Source: Royal Society of Chemistry journal article supplement (doi:10.1039/c6py01189f), 2016-01-01
Supplement: c6py01189f1.pdf [file c6py01189f1.pdf]

## Supporting Information

### A Polypeptide Micelles Template Method to Prepare Polydopamine Composite Nanoparticles for Synergistic Photothermal-Chemotherapy

Xingjie Wu<sup>1</sup>, Linzhu Zhou<sup>1</sup>, Yue Su<sup>1</sup> and Chang-Ming Dong\*<sup>1,2</sup>

<sup>1</sup>Department of Polymer Science & Engineering, School of Chemistry & Chemical Engineering, Shanghai Jiao Tong University, Shanghai 200240, P. R. China.

<sup>2</sup>Shanghai Key Laboratory of Electrical Insulation and Thermal Aging, Shanghai Jiao Tong University, Shanghai 200240, P. R. China.

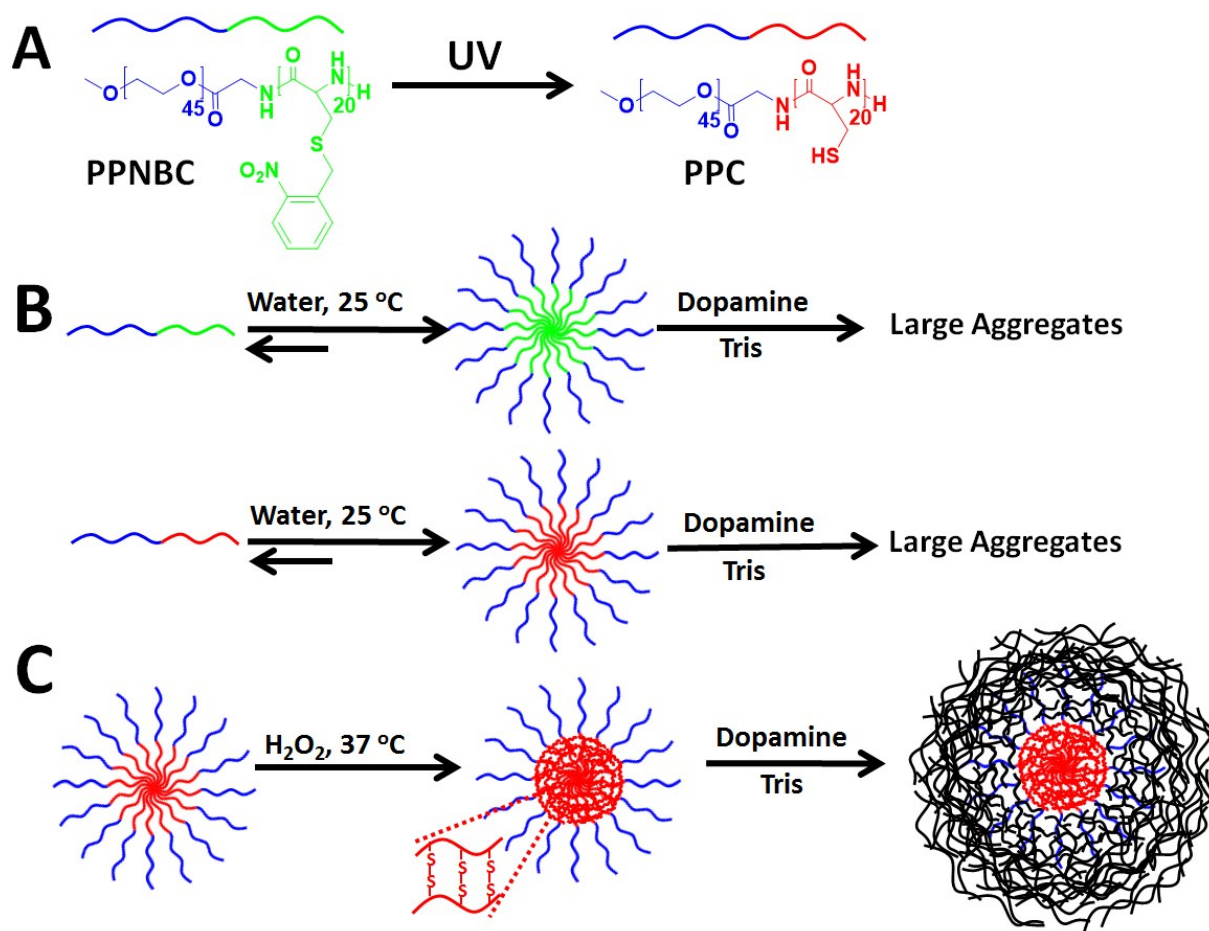

**Figure S1.** (A) the chemical structures of PPNBC and PPC; (B) the uncross-linked micelles of PPNBC and PPC were stirred with DA to form large aggregates; (C) the disulfide-bond cross-linked micelles of PPC were stirred with DA to form the nanocomposites.

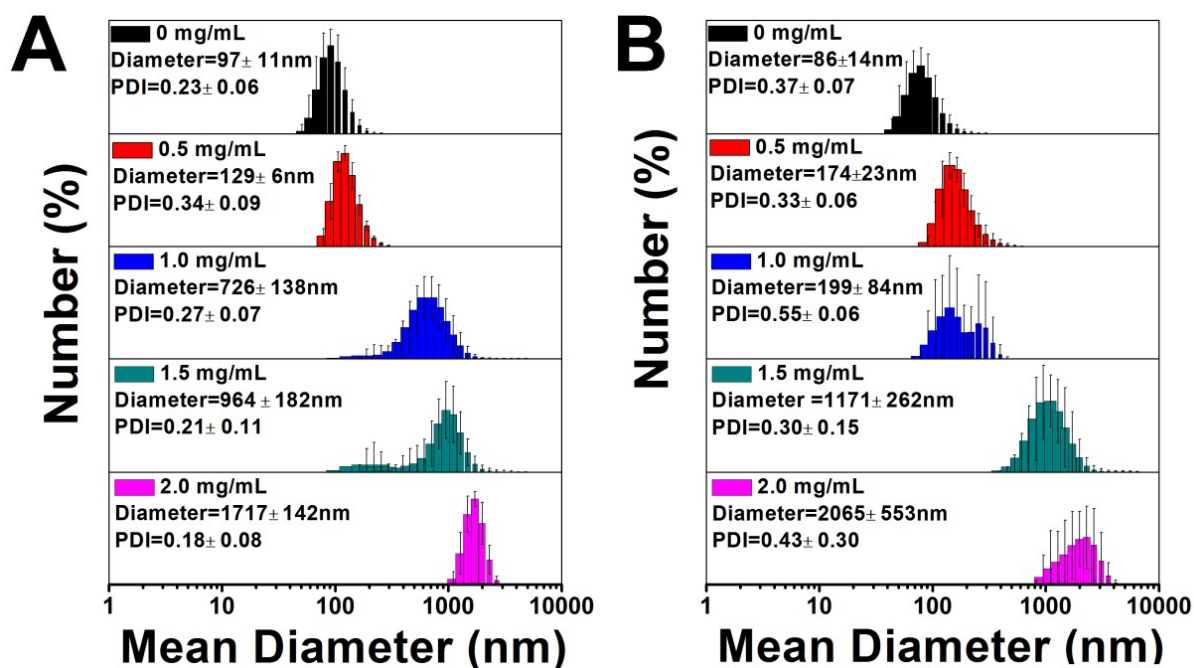

**Figure S2.** DLS data monitoring for the uncross-linked micelles of PPNBC (A) and/or PPC (B) stirring with different concentrations of DA for 4 h and at room temperature.

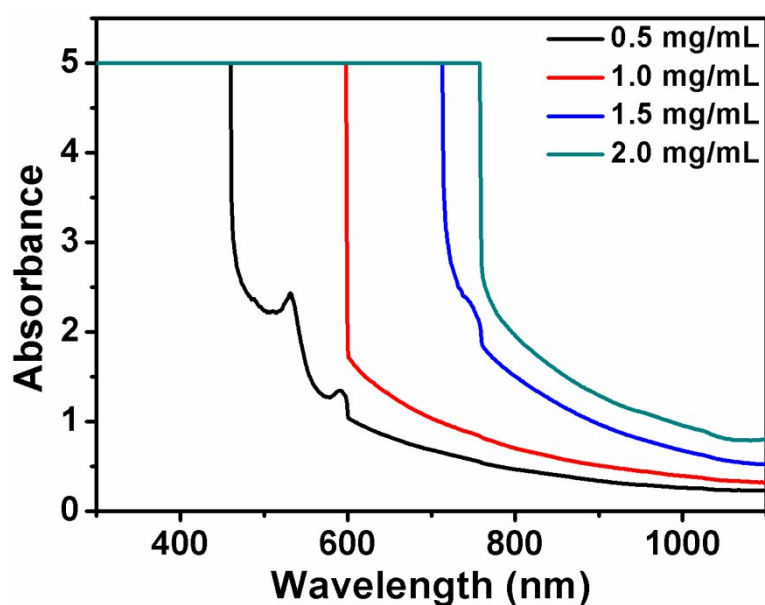

**Figure S3.** The NIR-vis spectra of the PPC@PDA composite nanoparticles (dispersed in 1 mL PBS, 0.35 – 1.08 mg/mL) that was prepared by PPC micelles (1 mL, 0.24 mg/mL) with DA (1 mL, 0.5 – 2.0 mg/mL) for 4 h.

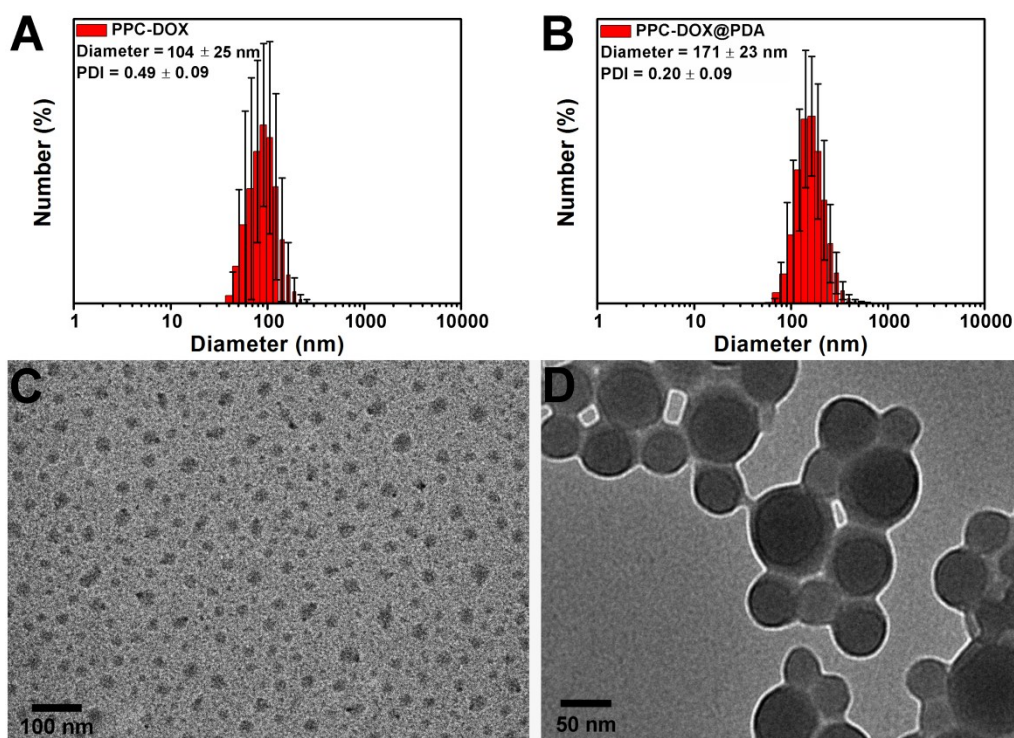

**Figure S4.** DLS (A, B) and TEM (C, D) data for the precursor DOX-loaded PPC micelles (i.e., PPC-DOX) and the resulting DOX-loaded nanocomposites (i.e., PPC-DOX@PDA).

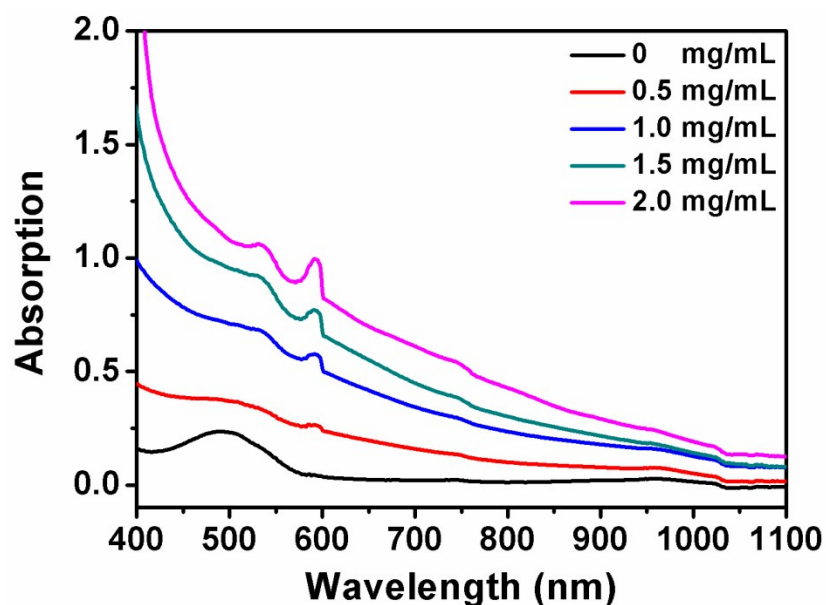

**Figure S5.** The Vis-NIR spectra of the PPC-DOX@PDA nanocomposites (dispersed in 5 mL PBS, 0.06 – 0.18) that was prepared by the DOX-loaded PPC micelles (1 mL, 0.28 mg/mL) with DA (1 mL, 0.5 – 2.0 mg/mL) for 4 h and at room temperature.

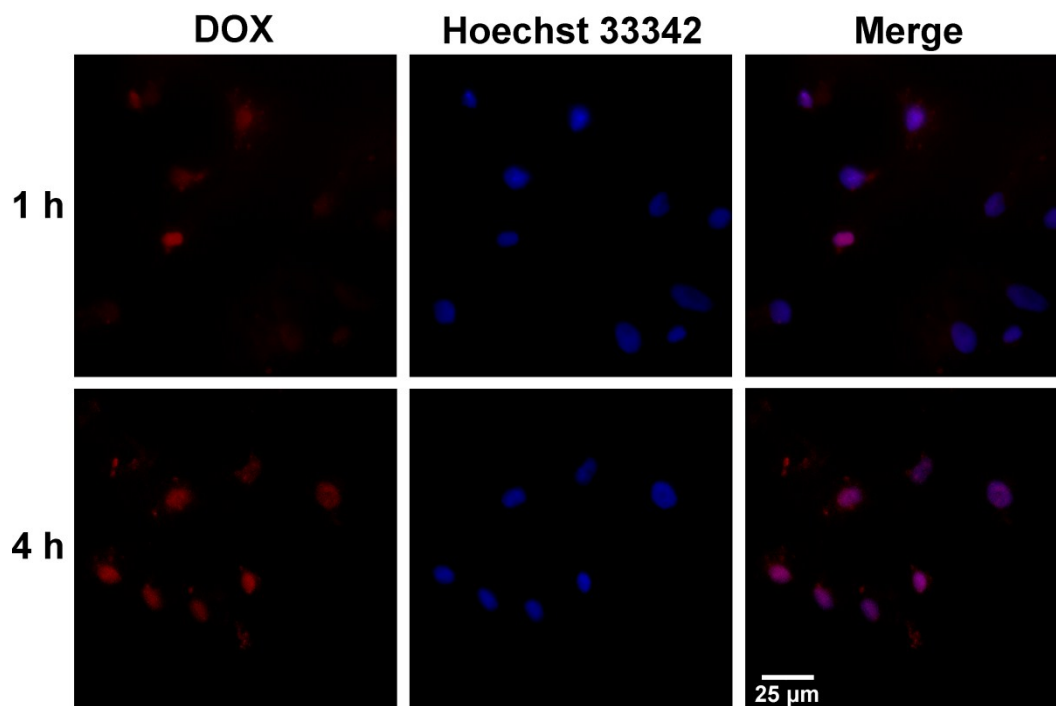

**Figure S6.** Fluorescence microscope images of HeLa cells incubated with the DOX-loaded PPC-DOX@PDA nanocomposites for different times and at 37 °C.

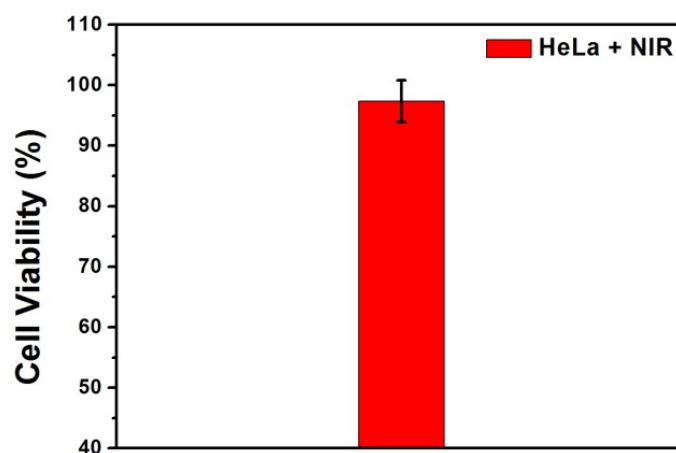

**Figure S7.** The cytotoxicity of the NIR laser irradiation (5 min, 808 nm, 2 W·cm<sup>-2</sup>) on HeLa cells. The cell viability was > 95%, which means that the NIR laser irradiation nearly induced no cytotoxicity.

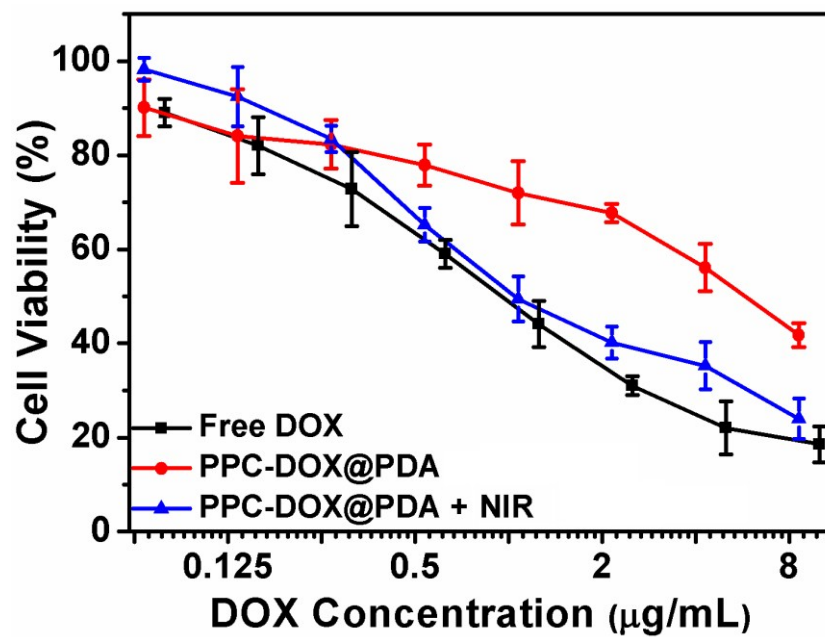

**Figure S8.** Cytotoxicity of free DOX or PPC-DOX@PDA incubated with HeLa cells under different treatments.
